# Supplementary material for: A structured overview of simultaneous component based data integration
Source: Springer Nature journal article supplement (doi:10.1186/1471-2105-10-246), 2009-08-11

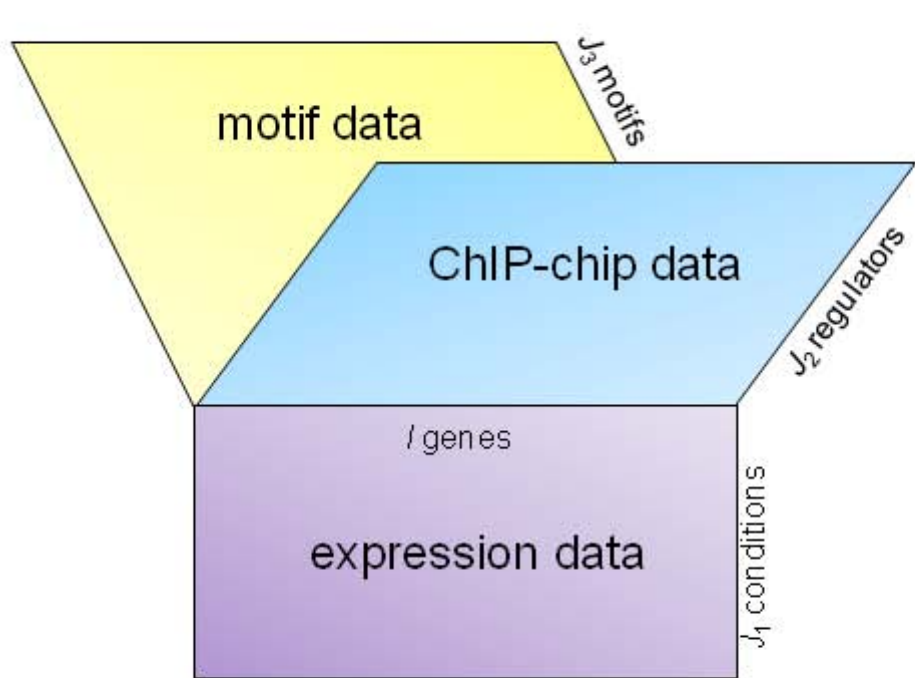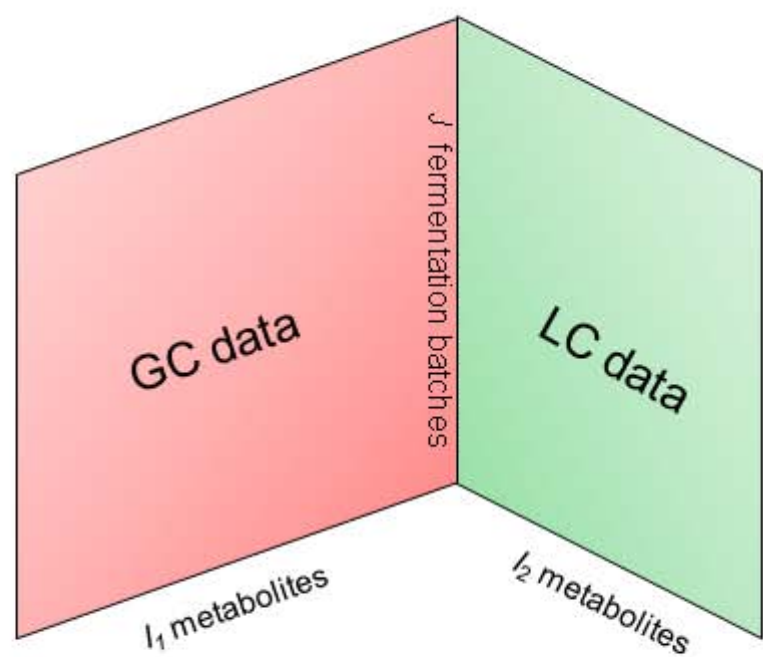

Supplement: 12859_2009_2976_MOESM2_ESM.pdf [file 12859_2009_2976_MOESM2_ESM.pdf]
